# Supplementary material
Source: publisher figshare collection journal article supplement (https://acs.figshare.com/ndownloader/files/4019101)
Supplement: Supplementary file 1 [file 4019101]

 
data_a 
 
_audit_creation_method            SHELXL-97 
_chemical_name_systematic 
; 
 ? 
; 
_chemical_name_common             ? 
_chemical_melting_point           ? 
_chemical_formula_moiety          ? 
_chemical_formula_sum 
 'C44 H70 Cl5 Co N4 O2' 
_chemical_formula_weight          923.22 
 
loop_ 
 _atom_type_symbol 
 _atom_type_description 
 _atom_type_scat_dispersion_real 
 _atom_type_scat_dispersion_imag 
 _atom_type_scat_source 
 'C'  'C'   0.0033   0.0016 
 'International Tables Vol C Tables 4.2.6.8 and 6.1.1.4' 
 'H'  'H'   0.0000   0.0000 
 'International Tables Vol C Tables 4.2.6.8 and 6.1.1.4' 
 'N'  'N'   0.0061   0.0033 
 'International Tables Vol C Tables 4.2.6.8 and 6.1.1.4' 
 'O'  'O'   0.0106   0.0060 
 'International Tables Vol C Tables 4.2.6.8 and 6.1.1.4' 
 'Co'  'Co'   0.3494   0.9721 
 'International Tables Vol C Tables 4.2.6.8 and 6.1.1.4' 
 'Cl'  'Cl'   0.1484   0.1585 
 'International Tables Vol C Tables 4.2.6.8 and 6.1.1.4' 
 
_symmetry_cell_setting            ? 
_symmetry_space_group_name_H-M    ? 
 
loop_ 
 _symmetry_equiv_pos_as_xyz 
 'x, y, z' 
 '-x, y, -z+1/2' 
 'x+1/2, y+1/2, z' 
 '-x+1/2, y+1/2, -z+1/2' 
 '-x, -y, -z' 
 'x, -y, z-1/2' 
 '-x+1/2, -y+1/2, -z' 
 'x+1/2, -y+1/2, z-1/2' 
 
_cell_length_a                    39.868(5) 
_cell_length_b                    11.8049(14) 
_cell_length_c                    19.788(2) 
_cell_angle_alpha                 90.00 
_cell_angle_beta                  93.947(2) 
_cell_angle_gamma                 90.00 
_cell_volume                      9290.9(19) 
_cell_formula_units_Z             8 
_cell_measurement_temperature     100(2) 
_cell_measurement_reflns_used     ? 
_cell_measurement_theta_min       ? 
_cell_measurement_theta_max       ? 
 
_exptl_crystal_description        ? 
_exptl_crystal_colour             ? 
_exptl_crystal_size_max           0.35 
_exptl_crystal_size_mid           0.05 
_exptl_crystal_size_min           0.01 
_exptl_crystal_density_meas       ? 
_exptl_crystal_density_diffrn     1.320 
_exptl_crystal_density_method     'not measured' 
_exptl_crystal_F_000              3920 
_exptl_absorpt_coefficient_mu     0.697 
_exptl_absorpt_correction_type    ? 
_exptl_absorpt_correction_T_min   0.7925 
_exptl_absorpt_correction_T_max   0.9931 
_exptl_absorpt_process_details    ? 
 
_exptl_special_details 
; 
 ? 
; 
 
_diffrn_ambient_temperature       100(2) 
_diffrn_radiation_wavelength      0.71073 
_diffrn_radiation_type            MoK\a 
_diffrn_radiation_source          'fine-focus sealed tube' 
_diffrn_radiation_monochromator   graphite 
_diffrn_measurement_device_type   ? 
_diffrn_measurement_method        ? 
_diffrn_detector_area_resol_mean  ? 
_diffrn_standards_number          ? 
_diffrn_standards_interval_count  ? 
_diffrn_standards_interval_time   ? 
_diffrn_standards_decay_%         ? 
_diffrn_reflns_number             44985 
_diffrn_reflns_av_R_equivalents   0.0975 
_diffrn_reflns_av_sigmaI/netI     0.0782 
_diffrn_reflns_limit_h_min        -50 
_diffrn_reflns_limit_h_max        50 
_diffrn_reflns_limit_k_min        -15 
_diffrn_reflns_limit_k_max        15 
_diffrn_reflns_limit_l_min        -25 
_diffrn_reflns_limit_l_max        25 
_diffrn_reflns_theta_min          1.02 
_diffrn_reflns_theta_max          27.00 
_reflns_number_total              10159 
_reflns_number_gt                 6346 
_reflns_threshold_expression      >2sigma(I) 
 
_computing_data_collection        ? 
_computing_cell_refinement        ? 
_computing_data_reduction         ? 
_computing_structure_solution     'SHELXS-97 (Sheldrick, 1990)' 
_computing_structure_refinement   'SHELXL-97 (Sheldrick, 1997)' 
_computing_molecular_graphics     ? 
_computing_publication_material   ? 
 
_refine_special_details 
; 
 Refinement of F^2^ against ALL reflections.  The weighted R-factor wR and 
 goodness of fit S are based on F^2^, conventional R-factors R are based 
 on F, with F set to zero for negative F^2^. The threshold expression of 
 F^2^ > 2sigma(F^2^) is used only for calculating R-factors(gt) etc. and is 
 not relevant to the choice of reflections for refinement.  R-factors based 
 on F^2^ are statistically about twice as large as those based on F, and R- 
 factors based on ALL data will be even larger. 
; 
 
_refine_ls_structure_factor_coef  Fsqd  
_refine_ls_matrix_type            full 
_refine_ls_weighting_scheme       calc  
_refine_ls_weighting_details 
 'calc w=1/[\s^2^(Fo^2^)+(0.1000P)^2^+0.0000P] where P=(Fo^2^+2Fc^2^)/3' 
_atom_sites_solution_primary      direct 
_atom_sites_solution_secondary    difmap 
_atom_sites_solution_hydrogens    geom 
_refine_ls_hydrogen_treatment     mixed 
_refine_ls_extinction_method      SHELXL 
_refine_ls_extinction_coef        0.00056(9) 
_refine_ls_extinction_expression 
 'Fc^*^=kFc[1+0.001xFc^2^\l^3^/sin(2\q)]^-1/4^' 
_refine_ls_number_reflns          10159 
_refine_ls_number_parameters      518 
_refine_ls_number_restraints      0 
_refine_ls_R_factor_all           0.1107 
_refine_ls_R_factor_gt            0.0580 
_refine_ls_wR_factor_ref          0.1845 
_refine_ls_wR_factor_gt           0.1494 
_refine_ls_goodness_of_fit_ref    1.049 
_refine_ls_restrained_S_all       1.049 
_refine_ls_shift/su_max           0.001 
_refine_ls_shift/su_mean          0.000 
 
loop_ 
 _atom_site_label 
 _atom_site_type_symbol 
 _atom_site_fract_x 
 _atom_site_fract_y 
 _atom_site_fract_z 
 _atom_site_U_iso_or_equiv 
 _atom_site_adp_type 
 _atom_site_occupancy 
 _atom_site_symmetry_multiplicity 
 _atom_site_calc_flag 
 _atom_site_refinement_flags 
 _atom_site_disorder_assembly 
 _atom_site_disorder_group 
Co1 Co 0.169704(12) 0.15539(5) 0.37891(2) 0.02085(15) Uani 1 1 d . . . 
O1 O 0.13731(6) 0.2693(2) 0.38518(12) 0.0252(6) Uani 1 1 d . . . 
N1 N 0.16358(7) 0.0917(3) 0.46527(13) 0.0200(6) Uani 1 1 d . . . 
N2 N 0.20117(7) 0.0321(3) 0.36864(14) 0.0244(7) Uani 1 1 d . . . 
H2NA H 0.2000 0.2901 0.4546 0.029 Uiso 1 1 d R . . 
H2NB H 0.2232 0.2269 0.4248 0.029 Uiso 1 1 d R . . 
C1 C 0.11681(9) 0.2833(3) 0.43336(17) 0.0215(8) Uani 1 1 d . . . 
C2 C 0.11920(9) 0.2194(3) 0.49416(17) 0.0210(8) Uani 1 1 d . . . 
C3 C 0.09701(9) 0.2412(3) 0.54533(18) 0.0239(8) Uani 1 1 d . . . 
H3A H 0.0992 0.1978 0.5858 0.029 Uiso 1 1 calc R . . 
C4 C 0.07256(9) 0.3221(3) 0.53888(18) 0.0227(8) Uani 1 1 d . . . 
C5 C 0.06997(9) 0.3817(3) 0.47646(18) 0.0248(8) Uani 1 1 d . . . 
H5A H 0.0527 0.4369 0.4702 0.030 Uiso 1 1 calc R . . 
C6 C 0.09052(9) 0.3656(3) 0.42436(18) 0.0236(8) Uani 1 1 d . . . 
C7 C 0.14245(9) 0.1277(3) 0.50621(17) 0.0223(8) Uani 1 1 d . . . 
H7A H 0.1421 0.0901 0.5486 0.027 Uiso 1 1 calc R . . 
C8 C 0.18629(9) -0.0045(3) 0.48211(17) 0.0233(8) Uani 1 1 d . . . 
H8A H 0.2082 0.0268 0.5014 0.028 Uiso 1 1 calc R . . 
C9 C 0.19225(9) -0.0599(3) 0.41427(17) 0.0237(8) Uani 1 1 d . . . 
H9A H 0.1706 -0.0941 0.3958 0.028 Uiso 1 1 calc R . . 
C10 C 0.21837(9) -0.1536(4) 0.42196(18) 0.0272(8) Uani 1 1 d . . . 
H10C H 0.2402 -0.1223 0.4401 0.033 Uiso 1 1 calc R . . 
H10D H 0.2215 -0.1887 0.3774 0.033 Uiso 1 1 calc R . . 
C11 C 0.20580(10) -0.2416(4) 0.47058(19) 0.0315(9) Uani 1 1 d . . . 
H11C H 0.1848 -0.2760 0.4504 0.038 Uiso 1 1 calc R . . 
H11D H 0.2228 -0.3025 0.4774 0.038 Uiso 1 1 calc R . . 
C12 C 0.19923(10) -0.1895(4) 0.53864(18) 0.0318(10) Uani 1 1 d . . . 
H12C H 0.2207 -0.1619 0.5608 0.038 Uiso 1 1 calc R . . 
H12D H 0.1902 -0.2484 0.5681 0.038 Uiso 1 1 calc R . . 
C13 C 0.17440(10) -0.0915(3) 0.53147(18) 0.0287(9) Uani 1 1 d . . . 
H13C H 0.1520 -0.1203 0.5150 0.034 Uiso 1 1 calc R . . 
H13D H 0.1723 -0.0556 0.5762 0.034 Uiso 1 1 calc R . . 
C14 C 0.04733(9) 0.3456(4) 0.59178(18) 0.0266(8) Uani 1 1 d . . . 
C15 C 0.04446(11) 0.4736(4) 0.6050(2) 0.0345(10) Uani 1 1 d . . . 
H15D H 0.0664 0.5032 0.6222 0.052 Uiso 1 1 calc R . . 
H15E H 0.0279 0.4869 0.6385 0.052 Uiso 1 1 calc R . . 
H15F H 0.0373 0.5124 0.5626 0.052 Uiso 1 1 calc R . . 
C16 C 0.05714(11) 0.2875(4) 0.6586(2) 0.0372(10) Uani 1 1 d . . . 
H16D H 0.0577 0.2053 0.6517 0.056 Uiso 1 1 calc R . . 
H16E H 0.0406 0.3057 0.6914 0.056 Uiso 1 1 calc R . . 
H16F H 0.0794 0.3138 0.6759 0.056 Uiso 1 1 calc R . . 
C17 C 0.01294(10) 0.3024(4) 0.5637(2) 0.0340(10) Uani 1 1 d . . . 
H17D H 0.0141 0.2205 0.5562 0.051 Uiso 1 1 calc R . . 
H17E H 0.0066 0.3405 0.5207 0.051 Uiso 1 1 calc R . . 
H17F H -0.0039 0.3185 0.5962 0.051 Uiso 1 1 calc R . . 
C18 C 0.08395(10) 0.4304(4) 0.3572(2) 0.0313(9) Uani 1 1 d . . . 
C19 C 0.07011(12) 0.3466(4) 0.3035(2) 0.0397(11) Uani 1 1 d . . . 
H19D H 0.0493 0.3127 0.3180 0.060 Uiso 1 1 calc R . . 
H19E H 0.0867 0.2869 0.2976 0.060 Uiso 1 1 calc R . . 
H19F H 0.0654 0.3863 0.2604 0.060 Uiso 1 1 calc R . . 
C20 C 0.11578(11) 0.4868(4) 0.3334(2) 0.0439(12) Uani 1 1 d . . . 
H20D H 0.1260 0.5345 0.3699 0.066 Uiso 1 1 calc R . . 
H20E H 0.1099 0.5337 0.2935 0.066 Uiso 1 1 calc R . . 
H20F H 0.1318 0.4283 0.3218 0.066 Uiso 1 1 calc R . . 
C21 C 0.05787(11) 0.5238(4) 0.3628(2) 0.0371(10) Uani 1 1 d . . . 
H21D H 0.0654 0.5761 0.3992 0.056 Uiso 1 1 calc R . . 
H21E H 0.0363 0.4902 0.3729 0.056 Uiso 1 1 calc R . . 
H21F H 0.0551 0.5653 0.3198 0.056 Uiso 1 1 calc R . . 
O1' O 0.13650(6) 0.0556(2) 0.34146(12) 0.0235(6) Uani 1 1 d . . . 
N1' N 0.17862(7) 0.2180(3) 0.29375(14) 0.0216(7) Uani 1 1 d . . . 
N2' N 0.20465(7) 0.2586(3) 0.41714(14) 0.0238(7) Uani 1 1 d . . . 
H2NC H 0.1998 0.0096 0.3271 0.029 Uiso 1 1 d R . . 
H2ND H 0.2194 0.0502 0.3753 0.029 Uiso 1 1 d R . . 
C1' C 0.11731(9) 0.0769(3) 0.28650(17) 0.0218(8) Uani 1 1 d . . . 
C2' C 0.12752(9) 0.1490(3) 0.23420(17) 0.0224(8) Uani 1 1 d . . . 
C3' C 0.10650(9) 0.1662(3) 0.17495(17) 0.0246(8) Uani 1 1 d . . . 
H3'A H 0.1141 0.2127 0.1400 0.029 Uiso 1 1 calc R . . 
C4' C 0.07542(9) 0.1177(3) 0.16658(17) 0.0236(8) Uani 1 1 d . . . 
C5' C 0.06585(9) 0.0462(3) 0.21852(17) 0.0238(8) Uani 1 1 d . . . 
H5'A H 0.0444 0.0109 0.2128 0.029 Uiso 1 1 calc R . . 
C6' C 0.08535(9) 0.0233(3) 0.27733(17) 0.0225(8) Uani 1 1 d . . . 
C7' C 0.15853(9) 0.2113(3) 0.24037(17) 0.0231(8) Uani 1 1 d . . . 
H7'A H 0.1647 0.2512 0.2014 0.028 Uiso 1 1 calc R . . 
C8' C 0.20914(9) 0.2890(4) 0.29784(18) 0.0257(8) Uani 1 1 d . . . 
H8'A H 0.2291 0.2375 0.2981 0.031 Uiso 1 1 calc R . . 
C9' C 0.20977(9) 0.3476(3) 0.36641(18) 0.0246(8) Uani 1 1 d . . . 
H9'A H 0.1903 0.4012 0.3659 0.029 Uiso 1 1 calc R . . 
C10' C 0.24198(10) 0.4155(4) 0.38080(19) 0.0304(9) Uani 1 1 d . . . 
H10A H 0.2412 0.4549 0.4249 0.036 Uiso 1 1 calc R . . 
H10B H 0.2615 0.3637 0.3836 0.036 Uiso 1 1 calc R . . 
C11' C 0.24589(11) 0.5021(4) 0.3248(2) 0.0360(10) Uani 1 1 d . . . 
H11A H 0.2280 0.5599 0.3263 0.043 Uiso 1 1 calc R . . 
H11B H 0.2678 0.5409 0.3326 0.043 Uiso 1 1 calc R . . 
C12' C 0.24392(10) 0.4470(4) 0.2556(2) 0.0356(10) Uani 1 1 d . . . 
H12A H 0.2639 0.3983 0.2519 0.043 Uiso 1 1 calc R . . 
H12B H 0.2445 0.5068 0.2206 0.043 Uiso 1 1 calc R . . 
C13' C 0.21232(10) 0.3756(4) 0.24162(19) 0.0311(9) Uani 1 1 d . . . 
H13A H 0.1923 0.4254 0.2386 0.037 Uiso 1 1 calc R . . 
H13B H 0.2134 0.3360 0.1977 0.037 Uiso 1 1 calc R . . 
C14' C 0.04991(9) 0.1408(4) 0.10615(18) 0.0264(9) Uani 1 1 d . . . 
C15' C 0.03742(10) 0.0298(4) 0.07477(19) 0.0333(10) Uani 1 1 d . . . 
H15A H 0.0564 -0.0124 0.0585 0.050 Uiso 1 1 calc R . . 
H15B H 0.0210 0.0455 0.0367 0.050 Uiso 1 1 calc R . . 
H15C H 0.0267 -0.0153 0.1089 0.050 Uiso 1 1 calc R . . 
C16' C 0.02030(10) 0.2059(4) 0.1318(2) 0.0335(10) Uani 1 1 d . . . 
H16A H 0.0037 0.2209 0.0940 0.050 Uiso 1 1 calc R . . 
H16B H 0.0283 0.2779 0.1517 0.050 Uiso 1 1 calc R . . 
H16C H 0.0099 0.1608 0.1663 0.050 Uiso 1 1 calc R . . 
C17' C 0.06565(10) 0.2117(4) 0.05216(19) 0.0318(9) Uani 1 1 d . . . 
H17A H 0.0857 0.1731 0.0376 0.048 Uiso 1 1 calc R . . 
H17B H 0.0720 0.2861 0.0710 0.048 Uiso 1 1 calc R . . 
H17C H 0.0494 0.2215 0.0132 0.048 Uiso 1 1 calc R . . 
C18' C 0.07251(9) -0.0547(3) 0.33180(18) 0.0250(8) Uani 1 1 d . . . 
C19' C 0.07133(11) 0.0099(4) 0.39859(18) 0.0344(10) Uani 1 1 d . . . 
H19A H 0.0581 0.0792 0.3911 0.052 Uiso 1 1 calc R . . 
H19B H 0.0942 0.0298 0.4156 0.052 Uiso 1 1 calc R . . 
H19C H 0.0609 -0.0379 0.4319 0.052 Uiso 1 1 calc R . . 
C20' C 0.09546(10) -0.1587(4) 0.3416(2) 0.0322(9) Uani 1 1 d . . . 
H20A H 0.1185 -0.1340 0.3544 0.048 Uiso 1 1 calc R . . 
H20B H 0.0951 -0.2018 0.2992 0.048 Uiso 1 1 calc R . . 
H20C H 0.0874 -0.2068 0.3775 0.048 Uiso 1 1 calc R . . 
C21' C 0.03687(9) -0.0975(4) 0.31339(19) 0.0288(9) Uani 1 1 d . . . 
H21A H 0.0214 -0.0330 0.3093 0.043 Uiso 1 1 calc R . . 
H21B H 0.0300 -0.1488 0.3489 0.043 Uiso 1 1 calc R . . 
H21C H 0.0364 -0.1381 0.2701 0.043 Uiso 1 1 calc R . . 
Cl1 Cl 0.27607(3) 0.12102(11) 0.42740(5) 0.0405(3) Uani 1 1 d . . . 
C1S C 0.14491(13) 0.4970(5) 0.0555(3) 0.0633(17) Uani 1 1 d . . . 
H1SA H 0.1338 0.5675 0.0387 0.076 Uiso 1 1 calc R . . 
H1SB H 0.1693 0.5048 0.0505 0.076 Uiso 1 1 calc R . . 
Cl1S Cl 0.12931(4) 0.38222(13) 0.00709(9) 0.0735(5) Uani 1 1 d . . . 
Cl2S Cl 0.13775(4) 0.47814(13) 0.14258(8) 0.0721(5) Uani 1 1 d . . . 
C2S C 0.16790(13) 0.7548(4) 0.1870(2) 0.0447(12) Uani 1 1 d . . . 
H2SA H 0.1476 0.7170 0.1662 0.054 Uiso 1 1 calc R . . 
H2SB H 0.1866 0.7418 0.1574 0.054 Uiso 1 1 calc R . . 
Cl3S Cl 0.17822(5) 0.69675(14) 0.26691(9) 0.0849(6) Uani 1 1 d . . . 
Cl4S Cl 0.16040(3) 0.90076(10) 0.19366(5) 0.0424(3) Uani 1 1 d . . . 
 
loop_ 
 _atom_site_aniso_label 
 _atom_site_aniso_U_11 
 _atom_site_aniso_U_22 
 _atom_site_aniso_U_33 
 _atom_site_aniso_U_23 
 _atom_site_aniso_U_13 
 _atom_site_aniso_U_12 
Co1 0.0169(2) 0.0328(3) 0.0123(2) 0.0003(2) -0.00276(17) 0.0021(2) 
O1 0.0224(13) 0.0368(16) 0.0165(12) 0.0042(11) 0.0022(10) 0.0041(11) 
N1 0.0185(15) 0.0294(18) 0.0114(13) -0.0007(12) -0.0041(11) 0.0038(13) 
N2 0.0198(15) 0.041(2) 0.0122(14) -0.0011(14) -0.0023(12) 0.0000(14) 
C1 0.0193(18) 0.029(2) 0.0162(16) 0.0001(15) -0.0007(14) -0.0011(15) 
C2 0.0200(17) 0.027(2) 0.0156(16) -0.0029(15) -0.0021(13) 0.0015(15) 
C3 0.0252(19) 0.030(2) 0.0159(17) 0.0019(15) -0.0047(14) 0.0000(16) 
C4 0.0212(18) 0.028(2) 0.0187(17) -0.0029(15) 0.0014(14) 0.0003(15) 
C5 0.0223(18) 0.027(2) 0.0250(19) 0.0011(16) -0.0010(15) 0.0040(15) 
C6 0.0214(18) 0.028(2) 0.0211(17) 0.0037(15) -0.0008(14) 0.0008(15) 
C7 0.0219(18) 0.031(2) 0.0129(16) -0.0013(15) -0.0052(13) -0.0009(15) 
C8 0.0226(18) 0.031(2) 0.0157(16) -0.0003(15) -0.0035(14) 0.0045(16) 
C9 0.0227(18) 0.035(2) 0.0131(16) 0.0033(15) -0.0030(14) 0.0043(16) 
C10 0.0234(19) 0.039(2) 0.0191(17) -0.0019(17) -0.0032(14) 0.0081(17) 
C11 0.030(2) 0.040(3) 0.0232(19) -0.0001(18) -0.0044(16) 0.0111(18) 
C12 0.035(2) 0.041(3) 0.0185(18) 0.0038(17) -0.0022(16) 0.0108(19) 
C13 0.031(2) 0.036(2) 0.0188(18) 0.0025(17) -0.0002(15) 0.0086(18) 
C14 0.0254(19) 0.035(2) 0.0195(17) -0.0005(17) 0.0044(15) 0.0025(17) 
C15 0.037(2) 0.036(2) 0.032(2) -0.0028(19) 0.0067(18) 0.0064(19) 
C16 0.044(3) 0.045(3) 0.023(2) 0.0037(19) 0.0086(18) 0.012(2) 
C17 0.026(2) 0.043(3) 0.034(2) -0.003(2) 0.0057(17) -0.0007(18) 
C18 0.032(2) 0.035(2) 0.028(2) 0.0093(18) 0.0046(17) 0.0100(18) 
C19 0.045(3) 0.052(3) 0.0208(19) 0.004(2) -0.0045(18) 0.017(2) 
C20 0.035(2) 0.047(3) 0.052(3) 0.022(2) 0.016(2) 0.008(2) 
C21 0.037(2) 0.041(3) 0.034(2) 0.013(2) 0.0062(19) 0.016(2) 
O1' 0.0207(13) 0.0333(16) 0.0158(12) 0.0039(11) -0.0045(10) 0.0005(11) 
N1' 0.0182(15) 0.0311(18) 0.0154(14) 0.0004(13) -0.0003(12) 0.0004(13) 
N2' 0.0186(15) 0.0357(19) 0.0166(14) -0.0012(13) -0.0015(12) 0.0015(13) 
C1' 0.0213(18) 0.031(2) 0.0127(16) -0.0012(15) -0.0033(13) 0.0030(15) 
C2' 0.0210(17) 0.028(2) 0.0174(16) 0.0007(15) -0.0037(14) 0.0005(15) 
C3' 0.029(2) 0.031(2) 0.0136(16) -0.0002(15) -0.0015(14) 0.0012(17) 
C4' 0.0241(19) 0.031(2) 0.0148(16) 0.0008(15) -0.0036(14) 0.0010(15) 
C5' 0.0198(18) 0.031(2) 0.0198(17) -0.0014(16) -0.0032(14) -0.0026(15) 
C6' 0.0213(18) 0.027(2) 0.0191(17) -0.0010(15) 0.0003(14) 0.0006(15) 
C7' 0.0213(18) 0.033(2) 0.0143(16) 0.0020(15) -0.0006(14) 0.0010(16) 
C8' 0.0174(18) 0.041(2) 0.0184(17) -0.0017(17) -0.0011(14) -0.0009(16) 
C9' 0.0216(18) 0.032(2) 0.0192(17) 0.0040(16) -0.0034(14) 0.0004(16) 
C10' 0.0233(19) 0.043(3) 0.0243(19) 0.0000(18) -0.0058(16) -0.0035(17) 
C11' 0.028(2) 0.041(3) 0.038(2) 0.007(2) -0.0065(18) -0.0082(19) 
C12' 0.028(2) 0.050(3) 0.029(2) 0.007(2) 0.0016(17) -0.0082(19) 
C13' 0.025(2) 0.045(3) 0.0219(19) 0.0057(18) -0.0037(16) -0.0061(18) 
C14' 0.0247(19) 0.038(2) 0.0160(17) 0.0028(16) -0.0065(14) -0.0008(17) 
C15' 0.035(2) 0.047(3) 0.0170(18) 0.0011(18) -0.0098(16) -0.0020(19) 
C16' 0.026(2) 0.046(3) 0.027(2) 0.0055(19) -0.0079(16) 0.0043(18) 
C17' 0.030(2) 0.046(3) 0.0174(18) 0.0056(18) -0.0102(16) 0.0012(18) 
C18' 0.0221(18) 0.034(2) 0.0179(17) 0.0045(16) -0.0045(14) -0.0052(16) 
C19' 0.037(2) 0.049(3) 0.0167(18) -0.0001(18) 0.0010(16) -0.009(2) 
C20' 0.030(2) 0.033(2) 0.032(2) 0.0069(19) -0.0059(17) -0.0040(18) 
C21' 0.025(2) 0.040(3) 0.0216(18) 0.0006(17) -0.0016(15) -0.0049(17) 
Cl1 0.0271(5) 0.0587(8) 0.0349(5) -0.0001(5) -0.0044(4) 0.0041(5) 
C1S 0.032(3) 0.053(4) 0.103(5) 0.029(3) -0.009(3) -0.011(2) 
Cl1S 0.0805(11) 0.0497(9) 0.0945(12) 0.0039(8) 0.0361(9) 0.0082(8) 
Cl2S 0.0695(9) 0.0603(9) 0.0800(10) 0.0208(8) -0.0418(8) -0.0095(7) 
C2S 0.048(3) 0.046(3) 0.039(3) 0.000(2) -0.006(2) 0.003(2) 
Cl3S 0.1264(15) 0.0534(9) 0.0681(10) 0.0110(8) -0.0413(10) 0.0135(9) 
Cl4S 0.0529(7) 0.0412(7) 0.0321(5) -0.0006(5) -0.0045(5) 0.0071(5) 
 
_geom_special_details 
; 
 All esds (except the esd in the dihedral angle between two l.s. planes) 
 are estimated using the full covariance matrix.  The cell esds are taken 
 into account individually in the estimation of esds in distances, angles 
 and torsion angles; correlations between esds in cell parameters are only 
 used when they are defined by crystal symmetry.  An approximate (isotropic) 
 treatment of cell esds is used for estimating esds involving l.s. planes. 
; 
 
loop_ 
 _geom_bond_atom_site_label_1 
 _geom_bond_atom_site_label_2 
 _geom_bond_distance 
 _geom_bond_site_symmetry_2 
 _geom_bond_publ_flag 
Co1 O1 1.875(3) . ? 
Co1 O1' 1.885(3) . ? 
Co1 N1' 1.896(3) . ? 
Co1 N1 1.898(3) . ? 
Co1 N2 1.941(3) . ? 
Co1 N2' 1.963(3) . ? 
O1 C1 1.308(4) . ? 
N1 C7 1.281(5) . ? 
N1 C8 1.476(5) . ? 
N2 C9 1.472(5) . ? 
N2 H2NC 0.8620 . ? 
N2 H2ND 0.7588 . ? 
C1 C2 1.418(5) . ? 
C1 C6 1.431(5) . ? 
C2 C3 1.413(5) . ? 
C2 C7 1.434(5) . ? 
C3 C4 1.365(5) . ? 
C3 H3A 0.9500 . ? 
C4 C5 1.419(5) . ? 
C4 C14 1.526(5) . ? 
C5 C6 1.373(5) . ? 
C5 H5A 0.9500 . ? 
C6 C18 1.541(5) . ? 
C7 H7A 0.9500 . ? 
C8 C13 1.515(5) . ? 
C8 C9 1.526(5) . ? 
C8 H8A 1.0000 . ? 
C9 C10 1.519(5) . ? 
C9 H9A 1.0000 . ? 
C10 C11 1.524(6) . ? 
C10 H10C 0.9900 . ? 
C10 H10D 0.9900 . ? 
C11 C12 1.520(5) . ? 
C11 H11C 0.9900 . ? 
C11 H11D 0.9900 . ? 
C12 C13 1.523(5) . ? 
C12 H12C 0.9900 . ? 
C12 H12D 0.9900 . ? 
C13 H13C 0.9900 . ? 
C13 H13D 0.9900 . ? 
C14 C16 1.517(5) . ? 
C14 C17 1.531(5) . ? 
C14 C15 1.539(6) . ? 
C15 H15D 0.9800 . ? 
C15 H15E 0.9800 . ? 
C15 H15F 0.9800 . ? 
C16 H16D 0.9800 . ? 
C16 H16E 0.9800 . ? 
C16 H16F 0.9800 . ? 
C17 H17D 0.9800 . ? 
C17 H17E 0.9800 . ? 
C17 H17F 0.9800 . ? 
C18 C21 1.525(5) . ? 
C18 C19 1.527(6) . ? 
C18 C20 1.535(6) . ? 
C19 H19D 0.9800 . ? 
C19 H19E 0.9800 . ? 
C19 H19F 0.9800 . ? 
C20 H20D 0.9800 . ? 
C20 H20E 0.9800 . ? 
C20 H20F 0.9800 . ? 
C21 H21D 0.9800 . ? 
C21 H21E 0.9800 . ? 
C21 H21F 0.9800 . ? 
O1' C1' 1.310(4) . ? 
N1' C7' 1.283(4) . ? 
N1' C8' 1.475(5) . ? 
N2' C9' 1.477(5) . ? 
N2' H2NA 0.8614 . ? 
N2' H2NB 0.8337 . ? 
C1' C2' 1.421(5) . ? 
C1' C6' 1.423(5) . ? 
C2' C3' 1.408(5) . ? 
C2' C7' 1.437(5) . ? 
C3' C4' 1.365(5) . ? 
C3' H3'A 0.9500 . ? 
C4' C5' 1.404(5) . ? 
C4' C14' 1.540(5) . ? 
C5' C6' 1.381(5) . ? 
C5' H5'A 0.9500 . ? 
C6' C18' 1.532(5) . ? 
C7' H7'A 0.9500 . ? 
C8' C9' 1.522(5) . ? 
C8' C13' 1.522(5) . ? 
C8' H8'A 1.0000 . ? 
C9' C10' 1.524(5) . ? 
C9' H9'A 1.0000 . ? 
C10' C11' 1.523(6) . ? 
C10' H10A 0.9900 . ? 
C10' H10B 0.9900 . ? 
C11' C12' 1.513(6) . ? 
C11' H11A 0.9900 . ? 
C11' H11B 0.9900 . ? 
C12' C13' 1.525(5) . ? 
C12' H12A 0.9900 . ? 
C12' H12B 0.9900 . ? 
C13' H13A 0.9900 . ? 
C13' H13B 0.9900 . ? 
C14' C15' 1.519(6) . ? 
C14' C16' 1.525(6) . ? 
C14' C17' 1.526(5) . ? 
C15' H15A 0.9800 . ? 
C15' H15B 0.9800 . ? 
C15' H15C 0.9800 . ? 
C16' H16A 0.9800 . ? 
C16' H16B 0.9800 . ? 
C16' H16C 0.9800 . ? 
C17' H17A 0.9800 . ? 
C17' H17B 0.9800 . ? 
C17' H17C 0.9800 . ? 
C18' C21' 1.528(5) . ? 
C18' C19' 1.529(5) . ? 
C18' C20' 1.536(6) . ? 
C19' H19A 0.9800 . ? 
C19' H19B 0.9800 . ? 
C19' H19C 0.9800 . ? 
C20' H20A 0.9800 . ? 
C20' H20B 0.9800 . ? 
C20' H20C 0.9800 . ? 
C21' H21A 0.9800 . ? 
C21' H21B 0.9800 . ? 
C21' H21C 0.9800 . ? 
C1S Cl1S 1.749(6) . ? 
C1S Cl2S 1.779(7) . ? 
C1S H1SA 0.9900 . ? 
C1S H1SB 0.9900 . ? 
C2S Cl3S 1.746(5) . ? 
C2S Cl4S 1.755(5) . ? 
C2S H2SA 0.9900 . ? 
C2S H2SB 0.9900 . ? 
 
loop_ 
 _geom_angle_atom_site_label_1 
 _geom_angle_atom_site_label_2 
 _geom_angle_atom_site_label_3 
 _geom_angle 
 _geom_angle_site_symmetry_1 
 _geom_angle_site_symmetry_3 
 _geom_angle_publ_flag 
O1 Co1 O1' 90.34(11) . . ? 
O1 Co1 N1' 87.21(12) . . ? 
O1' Co1 N1' 93.66(12) . . ? 
O1 Co1 N1 95.31(12) . . ? 
O1' Co1 N1 88.63(12) . . ? 
N1' Co1 N1 176.59(12) . . ? 
O1 Co1 N2 176.33(12) . . ? 
O1' Co1 N2 86.09(12) . . ? 
N1' Co1 N2 92.13(13) . . ? 
N1 Co1 N2 85.50(12) . . ? 
O1 Co1 N2' 90.18(12) . . ? 
O1' Co1 N2' 179.32(12) . . ? 
N1' Co1 N2' 85.93(13) . . ? 
N1 Co1 N2' 91.76(13) . . ? 
N2 Co1 N2' 93.38(13) . . ? 
C1 O1 Co1 127.4(2) . . ? 
C7 N1 C8 122.2(3) . . ? 
C7 N1 Co1 124.7(3) . . ? 
C8 N1 Co1 113.1(2) . . ? 
C9 N2 Co1 107.7(2) . . ? 
C9 N2 H2NC 110.8 . . ? 
Co1 N2 H2NC 109.4 . . ? 
C9 N2 H2ND 111.7 . . ? 
Co1 N2 H2ND 112.8 . . ? 
H2NC N2 H2ND 104.5 . . ? 
O1 C1 C2 122.8(3) . . ? 
O1 C1 C6 119.0(3) . . ? 
C2 C1 C6 118.2(3) . . ? 
C3 C2 C1 120.1(3) . . ? 
C3 C2 C7 116.6(3) . . ? 
C1 C2 C7 123.2(3) . . ? 
C4 C3 C2 122.6(3) . . ? 
C4 C3 H3A 118.7 . . ? 
C2 C3 H3A 118.7 . . ? 
C3 C4 C5 115.9(3) . . ? 
C3 C4 C14 124.3(3) . . ? 
C5 C4 C14 119.7(3) . . ? 
C6 C5 C4 125.0(3) . . ? 
C6 C5 H5A 117.5 . . ? 
C4 C5 H5A 117.5 . . ? 
C5 C6 C1 118.0(3) . . ? 
C5 C6 C18 120.3(3) . . ? 
C1 C6 C18 121.6(3) . . ? 
N1 C7 C2 126.2(3) . . ? 
N1 C7 H7A 116.9 . . ? 
C2 C7 H7A 116.9 . . ? 
N1 C8 C13 116.9(3) . . ? 
N1 C8 C9 105.2(3) . . ? 
C13 C8 C9 110.6(3) . . ? 
N1 C8 H8A 108.0 . . ? 
C13 C8 H8A 108.0 . . ? 
C9 C8 H8A 108.0 . . ? 
N2 C9 C10 113.9(3) . . ? 
N2 C9 C8 106.4(3) . . ? 
C10 C9 C8 111.8(3) . . ? 
N2 C9 H9A 108.2 . . ? 
C10 C9 H9A 108.2 . . ? 
C8 C9 H9A 108.2 . . ? 
C9 C10 C11 107.9(3) . . ? 
C9 C10 H10C 110.1 . . ? 
C11 C10 H10C 110.1 . . ? 
C9 C10 H10D 110.1 . . ? 
C11 C10 H10D 110.1 . . ? 
H10C C10 H10D 108.4 . . ? 
C12 C11 C10 111.6(4) . . ? 
C12 C11 H11C 109.3 . . ? 
C10 C11 H11C 109.3 . . ? 
C12 C11 H11D 109.3 . . ? 
C10 C11 H11D 109.3 . . ? 
H11C C11 H11D 108.0 . . ? 
C11 C12 C13 112.1(3) . . ? 
C11 C12 H12C 109.2 . . ? 
C13 C12 H12C 109.2 . . ? 
C11 C12 H12D 109.2 . . ? 
C13 C12 H12D 109.2 . . ? 
H12C C12 H12D 107.9 . . ? 
C8 C13 C12 110.1(3) . . ? 
C8 C13 H13C 109.6 . . ? 
C12 C13 H13C 109.6 . . ? 
C8 C13 H13D 109.6 . . ? 
C12 C13 H13D 109.6 . . ? 
H13C C13 H13D 108.1 . . ? 
C16 C14 C4 111.9(3) . . ? 
C16 C14 C17 109.6(3) . . ? 
C4 C14 C17 107.8(3) . . ? 
C16 C14 C15 108.3(3) . . ? 
C4 C14 C15 110.8(3) . . ? 
C17 C14 C15 108.3(3) . . ? 
C14 C15 H15D 109.5 . . ? 
C14 C15 H15E 109.5 . . ? 
H15D C15 H15E 109.5 . . ? 
C14 C15 H15F 109.5 . . ? 
H15D C15 H15F 109.5 . . ? 
H15E C15 H15F 109.5 . . ? 
C14 C16 H16D 109.5 . . ? 
C14 C16 H16E 109.5 . . ? 
H16D C16 H16E 109.5 . . ? 
C14 C16 H16F 109.5 . . ? 
H16D C16 H16F 109.5 . . ? 
H16E C16 H16F 109.5 . . ? 
C14 C17 H17D 109.5 . . ? 
C14 C17 H17E 109.5 . . ? 
H17D C17 H17E 109.5 . . ? 
C14 C17 H17F 109.5 . . ? 
H17D C17 H17F 109.5 . . ? 
H17E C17 H17F 109.5 . . ? 
C21 C18 C19 107.7(3) . . ? 
C21 C18 C20 106.9(4) . . ? 
C19 C18 C20 109.6(4) . . ? 
C21 C18 C6 111.9(3) . . ? 
C19 C18 C6 108.1(3) . . ? 
C20 C18 C6 112.6(3) . . ? 
C18 C19 H19D 109.5 . . ? 
C18 C19 H19E 109.5 . . ? 
H19D C19 H19E 109.5 . . ? 
C18 C19 H19F 109.5 . . ? 
H19D C19 H19F 109.5 . . ? 
H19E C19 H19F 109.5 . . ? 
C18 C20 H20D 109.5 . . ? 
C18 C20 H20E 109.5 . . ? 
H20D C20 H20E 109.5 . . ? 
C18 C20 H20F 109.5 . . ? 
H20D C20 H20F 109.5 . . ? 
H20E C20 H20F 109.5 . . ? 
C18 C21 H21D 109.5 . . ? 
C18 C21 H21E 109.5 . . ? 
H21D C21 H21E 109.5 . . ? 
C18 C21 H21F 109.5 . . ? 
H21D C21 H21F 109.5 . . ? 
H21E C21 H21F 109.5 . . ? 
C1' O1' Co1 124.1(2) . . ? 
C7' N1' C8' 123.1(3) . . ? 
C7' N1' Co1 124.3(3) . . ? 
C8' N1' Co1 112.2(2) . . ? 
C9' N2' Co1 107.9(2) . . ? 
C9' N2' H2NA 109.1 . . ? 
Co1 N2' H2NA 114.2 . . ? 
C9' N2' H2NB 106.2 . . ? 
Co1 N2' H2NB 112.9 . . ? 
H2NA N2' H2NB 106.2 . . ? 
O1' C1' C2' 122.6(3) . . ? 
O1' C1' C6' 119.2(3) . . ? 
C2' C1' C6' 118.2(3) . . ? 
C3' C2' C1' 120.6(3) . . ? 
C3' C2' C7' 117.2(3) . . ? 
C1' C2' C7' 122.2(3) . . ? 
C4' C3' C2' 121.6(3) . . ? 
C4' C3' H3'A 119.2 . . ? 
C2' C3' H3'A 119.2 . . ? 
C3' C4' C5' 117.0(3) . . ? 
C3' C4' C14' 124.5(3) . . ? 
C5' C4' C14' 118.5(3) . . ? 
C6' C5' C4' 124.7(3) . . ? 
C6' C5' H5'A 117.7 . . ? 
C4' C5' H5'A 117.7 . . ? 
C5' C6' C1' 117.9(3) . . ? 
C5' C6' C18' 121.0(3) . . ? 
C1' C6' C18' 121.1(3) . . ? 
N1' C7' C2' 125.9(3) . . ? 
N1' C7' H7'A 117.1 . . ? 
C2' C7' H7'A 117.1 . . ? 
N1' C8' C9' 105.7(3) . . ? 
N1' C8' C13' 116.8(3) . . ? 
C9' C8' C13' 110.5(3) . . ? 
N1' C8' H8'A 107.8 . . ? 
C9' C8' H8'A 107.8 . . ? 
C13' C8' H8'A 107.8 . . ? 
N2' C9' C8' 106.7(3) . . ? 
N2' C9' C10' 113.7(3) . . ? 
C8' C9' C10' 111.6(3) . . ? 
N2' C9' H9'A 108.2 . . ? 
C8' C9' H9'A 108.2 . . ? 
C10' C9' H9'A 108.2 . . ? 
C11' C10' C9' 110.1(3) . . ? 
C11' C10' H10A 109.6 . . ? 
C9' C10' H10A 109.6 . . ? 
C11' C10' H10B 109.6 . . ? 
C9' C10' H10B 109.6 . . ? 
H10A C10' H10B 108.1 . . ? 
C12' C11' C10' 111.6(4) . . ? 
C12' C11' H11A 109.3 . . ? 
C10' C11' H11A 109.3 . . ? 
C12' C11' H11B 109.3 . . ? 
C10' C11' H11B 109.3 . . ? 
H11A C11' H11B 108.0 . . ? 
C11' C12' C13' 113.1(3) . . ? 
C11' C12' H12A 109.0 . . ? 
C13' C12' H12A 109.0 . . ? 
C11' C12' H12B 109.0 . . ? 
C13' C12' H12B 109.0 . . ? 
H12A C12' H12B 107.8 . . ? 
C8' C13' C12' 110.3(3) . . ? 
C8' C13' H13A 109.6 . . ? 
C12' C13' H13A 109.6 . . ? 
C8' C13' H13B 109.6 . . ? 
C12' C13' H13B 109.6 . . ? 
H13A C13' H13B 108.1 . . ? 
C15' C14' C16' 109.3(3) . . ? 
C15' C14' C17' 109.0(3) . . ? 
C16' C14' C17' 108.8(3) . . ? 
C15' C14' C4' 110.2(3) . . ? 
C16' C14' C4' 108.4(3) . . ? 
C17' C14' C4' 111.1(3) . . ? 
C14' C15' H15A 109.5 . . ? 
C14' C15' H15B 109.5 . . ? 
H15A C15' H15B 109.5 . . ? 
C14' C15' H15C 109.5 . . ? 
H15A C15' H15C 109.5 . . ? 
H15B C15' H15C 109.5 . . ? 
C14' C16' H16A 109.5 . . ? 
C14' C16' H16B 109.5 . . ? 
H16A C16' H16B 109.5 . . ? 
C14' C16' H16C 109.5 . . ? 
H16A C16' H16C 109.5 . . ? 
H16B C16' H16C 109.5 . . ? 
C14' C17' H17A 109.5 . . ? 
C14' C17' H17B 109.5 . . ? 
H17A C17' H17B 109.5 . . ? 
C14' C17' H17C 109.5 . . ? 
H17A C17' H17C 109.5 . . ? 
H17B C17' H17C 109.5 . . ? 
C21' C18' C19' 106.7(3) . . ? 
C21' C18' C6' 112.4(3) . . ? 
C19' C18' C6' 109.9(3) . . ? 
C21' C18' C20' 107.6(3) . . ? 
C19' C18' C20' 110.0(3) . . ? 
C6' C18' C20' 110.2(3) . . ? 
C18' C19' H19A 109.5 . . ? 
C18' C19' H19B 109.5 . . ? 
H19A C19' H19B 109.5 . . ? 
C18' C19' H19C 109.5 . . ? 
H19A C19' H19C 109.5 . . ? 
H19B C19' H19C 109.5 . . ? 
C18' C20' H20A 109.5 . . ? 
C18' C20' H20B 109.5 . . ? 
H20A C20' H20B 109.5 . . ? 
C18' C20' H20C 109.5 . . ? 
H20A C20' H20C 109.5 . . ? 
H20B C20' H20C 109.5 . . ? 
C18' C21' H21A 109.5 . . ? 
C18' C21' H21B 109.5 . . ? 
H21A C21' H21B 109.5 . . ? 
C18' C21' H21C 109.5 . . ? 
H21A C21' H21C 109.5 . . ? 
H21B C21' H21C 109.5 . . ? 
Cl1S C1S Cl2S 111.0(3) . . ? 
Cl1S C1S H1SA 109.4 . . ? 
Cl2S C1S H1SA 109.4 . . ? 
Cl1S C1S H1SB 109.4 . . ? 
Cl2S C1S H1SB 109.4 . . ? 
H1SA C1S H1SB 108.0 . . ? 
Cl3S C2S Cl4S 110.4(3) . . ? 
Cl3S C2S H2SA 109.6 . . ? 
Cl4S C2S H2SA 109.6 . . ? 
Cl3S C2S H2SB 109.6 . . ? 
Cl4S C2S H2SB 109.6 . . ? 
H2SA C2S H2SB 108.1 . . ? 
 
loop_ 
 _geom_torsion_atom_site_label_1 
 _geom_torsion_atom_site_label_2 
 _geom_torsion_atom_site_label_3 
 _geom_torsion_atom_site_label_4 
 _geom_torsion 
 _geom_torsion_site_symmetry_1 
 _geom_torsion_site_symmetry_2 
 _geom_torsion_site_symmetry_3 
 _geom_torsion_site_symmetry_4 
 _geom_torsion_publ_flag 
O1' Co1 O1 C1 83.1(3) . . . . ? 
N1' Co1 O1 C1 176.8(3) . . . . ? 
N1 Co1 O1 C1 -5.5(3) . . . . ? 
N2 Co1 O1 C1 97.0(19) . . . . ? 
N2' Co1 O1 C1 -97.3(3) . . . . ? 
O1 Co1 N1 C7 0.6(3) . . . . ? 
O1' Co1 N1 C7 -89.6(3) . . . . ? 
N1' Co1 N1 C7 138(2) . . . . ? 
N2 Co1 N1 C7 -175.8(3) . . . . ? 
N2' Co1 N1 C7 90.9(3) . . . . ? 
O1 Co1 N1 C8 -178.5(2) . . . . ? 
O1' Co1 N1 C8 91.3(2) . . . . ? 
N1' Co1 N1 C8 -41(2) . . . . ? 
N2 Co1 N1 C8 5.1(2) . . . . ? 
N2' Co1 N1 C8 -88.2(2) . . . . ? 
O1 Co1 N2 C9 -79.6(19) . . . . ? 
O1' Co1 N2 C9 -65.6(2) . . . . ? 
N1' Co1 N2 C9 -159.2(2) . . . . ? 
N1 Co1 N2 C9 23.3(2) . . . . ? 
N2' Co1 N2 C9 114.8(2) . . . . ? 
Co1 O1 C1 C2 8.2(5) . . . . ? 
Co1 O1 C1 C6 -171.0(3) . . . . ? 
O1 C1 C2 C3 177.8(3) . . . . ? 
C6 C1 C2 C3 -2.9(5) . . . . ? 
O1 C1 C2 C7 -5.1(6) . . . . ? 
C6 C1 C2 C7 174.1(3) . . . . ? 
C1 C2 C3 C4 0.6(6) . . . . ? 
C7 C2 C3 C4 -176.7(3) . . . . ? 
C2 C3 C4 C5 1.8(5) . . . . ? 
C2 C3 C4 C14 177.8(4) . . . . ? 
C3 C4 C5 C6 -1.8(6) . . . . ? 
C14 C4 C5 C6 -178.1(4) . . . . ? 
C4 C5 C6 C1 -0.5(6) . . . . ? 
C4 C5 C6 C18 176.3(4) . . . . ? 
O1 C1 C6 C5 -177.9(3) . . . . ? 
C2 C1 C6 C5 2.9(5) . . . . ? 
O1 C1 C6 C18 5.3(5) . . . . ? 
C2 C1 C6 C18 -174.0(3) . . . . ? 
C8 N1 C7 C2 -179.3(3) . . . . ? 
Co1 N1 C7 C2 1.7(5) . . . . ? 
C3 C2 C7 N1 177.1(4) . . . . ? 
C1 C2 C7 N1 -0.1(6) . . . . ? 
C7 N1 C8 C13 27.0(5) . . . . ? 
Co1 N1 C8 C13 -153.9(3) . . . . ? 
C7 N1 C8 C9 150.1(3) . . . . ? 
Co1 N1 C8 C9 -30.8(3) . . . . ? 
Co1 N2 C9 C10 -169.2(2) . . . . ? 
Co1 N2 C9 C8 -45.6(3) . . . . ? 
N1 C8 C9 N2 48.8(4) . . . . ? 
C13 C8 C9 N2 175.8(3) . . . . ? 
N1 C8 C9 C10 173.7(3) . . . . ? 
C13 C8 C9 C10 -59.2(4) . . . . ? 
N2 C9 C10 C11 179.7(3) . . . . ? 
C8 C9 C10 C11 59.1(4) . . . . ? 
C9 C10 C11 C12 -57.4(4) . . . . ? 
C10 C11 C12 C13 56.6(5) . . . . ? 
N1 C8 C13 C12 175.2(3) . . . . ? 
C9 C8 C13 C12 55.0(4) . . . . ? 
C11 C12 C13 C8 -54.4(5) . . . . ? 
C3 C4 C14 C16 12.6(5) . . . . ? 
C5 C4 C14 C16 -171.5(4) . . . . ? 
C3 C4 C14 C17 -108.1(4) . . . . ? 
C5 C4 C14 C17 67.8(5) . . . . ? 
C3 C4 C14 C15 133.6(4) . . . . ? 
C5 C4 C14 C15 -50.5(5) . . . . ? 
C5 C6 C18 C21 10.7(5) . . . . ? 
C1 C6 C18 C21 -172.6(4) . . . . ? 
C5 C6 C18 C19 -107.7(4) . . . . ? 
C1 C6 C18 C19 69.1(5) . . . . ? 
C5 C6 C18 C20 131.1(4) . . . . ? 
C1 C6 C18 C20 -52.1(5) . . . . ? 
O1 Co1 O1' C1' 57.0(3) . . . . ? 
N1' Co1 O1' C1' -30.3(3) . . . . ? 
N1 Co1 O1' C1' 152.3(3) . . . . ? 
N2 Co1 O1' C1' -122.2(3) . . . . ? 
N2' Co1 O1' C1' -83(11) . . . . ? 
O1 Co1 N1' C7' -71.1(3) . . . . ? 
O1' Co1 N1' C7' 19.1(3) . . . . ? 
N1 Co1 N1' C7' 151(2) . . . . ? 
N2 Co1 N1' C7' 105.3(3) . . . . ? 
N2' Co1 N1' C7' -161.5(3) . . . . ? 
O1 Co1 N1' C8' 101.0(3) . . . . ? 
O1' Co1 N1' C8' -168.8(2) . . . . ? 
N1 Co1 N1' C8' -37(2) . . . . ? 
N2 Co1 N1' C8' -82.6(3) . . . . ? 
N2' Co1 N1' C8' 10.6(3) . . . . ? 
O1 Co1 N2' C9' -69.2(2) . . . . ? 
O1' Co1 N2' C9' 70(11) . . . . ? 
N1' Co1 N2' C9' 18.0(2) . . . . ? 
N1 Co1 N2' C9' -164.5(2) . . . . ? 
N2 Co1 N2' C9' 109.9(2) . . . . ? 
Co1 O1' C1' C2' 27.4(5) . . . . ? 
Co1 O1' C1' C6' -154.6(3) . . . . ? 
O1' C1' C2' C3' 177.7(4) . . . . ? 
C6' C1' C2' C3' -0.3(6) . . . . ? 
O1' C1' C2' C7' -5.3(6) . . . . ? 
C6' C1' C2' C7' 176.7(4) . . . . ? 
C1' C2' C3' C4' 2.2(6) . . . . ? 
C7' C2' C3' C4' -174.9(4) . . . . ? 
C2' C3' C4' C5' -2.5(6) . . . . ? 
C2' C3' C4' C14' 174.5(4) . . . . ? 
C3' C4' C5' C6' 1.1(6) . . . . ? 
C14' C4' C5' C6' -176.1(4) . . . . ? 
C4' C5' C6' C1' 0.7(6) . . . . ? 
C4' C5' C6' C18' 179.0(4) . . . . ? 
O1' C1' C6' C5' -179.2(3) . . . . ? 
C2' C1' C6' C5' -1.1(5) . . . . ? 
O1' C1' C6' C18' 2.5(5) . . . . ? 
C2' C1' C6' C18' -179.4(3) . . . . ? 
C8' N1' C7' C2' -176.3(4) . . . . ? 
Co1 N1' C7' C2' -5.1(6) . . . . ? 
C3' C2' C7' N1' 170.4(4) . . . . ? 
C1' C2' C7' N1' -6.6(6) . . . . ? 
C7' N1' C8' C9' 136.5(4) . . . . ? 
Co1 N1' C8' C9' -35.6(3) . . . . ? 
C7' N1' C8' C13' 13.3(5) . . . . ? 
Co1 N1' C8' C13' -158.9(3) . . . . ? 
Co1 N2' C9' C8' -41.5(3) . . . . ? 
Co1 N2' C9' C10' -165.0(3) . . . . ? 
N1' C8' C9' N2' 49.6(4) . . . . ? 
C13' C8' C9' N2' 176.9(3) . . . . ? 
N1' C8' C9' C10' 174.4(3) . . . . ? 
C13' C8' C9' C10' -58.4(4) . . . . ? 
N2' C9' C10' C11' 177.9(3) . . . . ? 
C8' C9' C10' C11' 57.1(5) . . . . ? 
C9' C10' C11' C12' -54.0(5) . . . . ? 
C10' C11' C12' C13' 53.5(5) . . . . ? 
N1' C8' C13' C12' 176.3(3) . . . . ? 
C9' C8' C13' C12' 55.5(4) . . . . ? 
C11' C12' C13' C8' -53.9(5) . . . . ? 
C3' C4' C14' C15' 128.8(4) . . . . ? 
C5' C4' C14' C15' -54.2(5) . . . . ? 
C3' C4' C14' C16' -111.5(4) . . . . ? 
C5' C4' C14' C16' 65.4(5) . . . . ? 
C3' C4' C14' C17' 7.9(6) . . . . ? 
C5' C4' C14' C17' -175.1(4) . . . . ? 
C5' C6' C18' C21' -1.6(5) . . . . ? 
C1' C6' C18' C21' 176.6(3) . . . . ? 
C5' C6' C18' C19' -120.3(4) . . . . ? 
C1' C6' C18' C19' 57.9(5) . . . . ? 
C5' C6' C18' C20' 118.3(4) . . . . ? 
C1' C6' C18' C20' -63.5(5) . . . . ? 
 
_diffrn_measured_fraction_theta_max    1.000 
_diffrn_reflns_theta_full              27.00 
_diffrn_measured_fraction_theta_full   1.000 
_refine_diff_density_max    0.977 
_refine_diff_density_min   -0.803 
_refine_diff_density_rms    0.148 
